# Supplementary material
Source: PubMed Central journal article supplement (PMC5555148)
Supplement: NIHMS885952-supplement-1.pdf [file NIHMS885952-supplement-1.pdf]

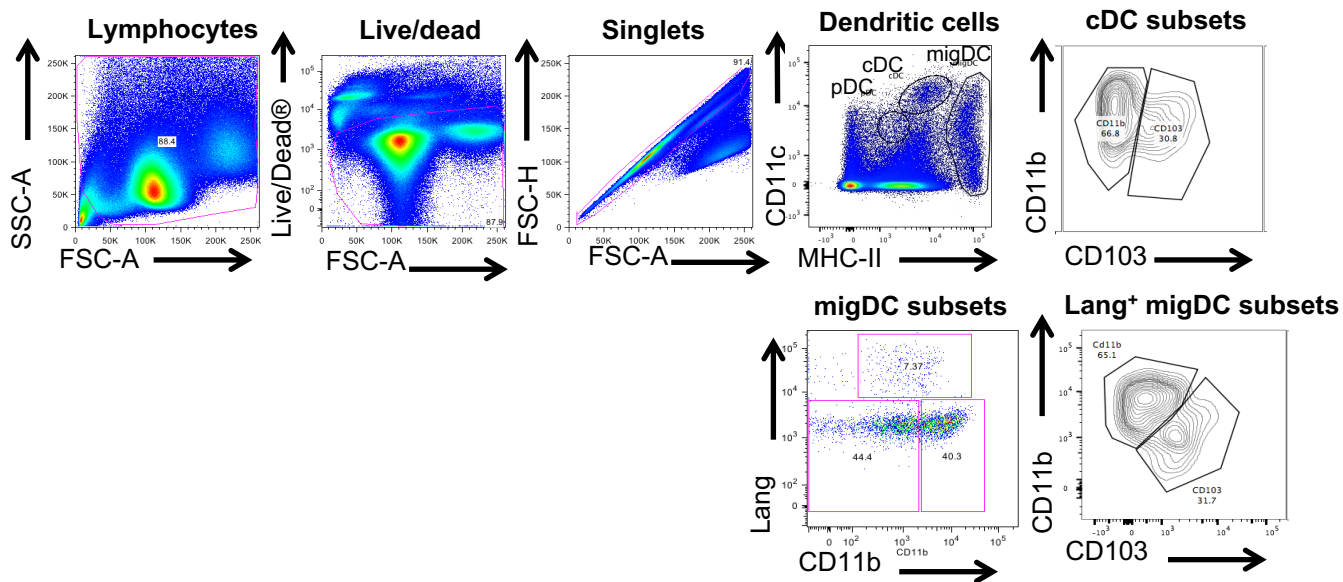

**Supplementary Figure S1. Multi-parameter flow cytometry gating schematics for dendritic cell analysis.**

Gating schematic to identify dendritic cell subsets within skin-draining lymph nodes. Dendritic cells (DCs) in skin-draining lymph nodes were processed and stained for multi-parameter flow cytometry 24 hours after vaccination with 40  $\mu\text{g}$  Alexa Fluor-488-labeled ovalbumin (OVA) with or without one minute continuous wave (CW) or pulsed-wave (PW) 1064 nm NIR laser treatment.

**Figure S1**

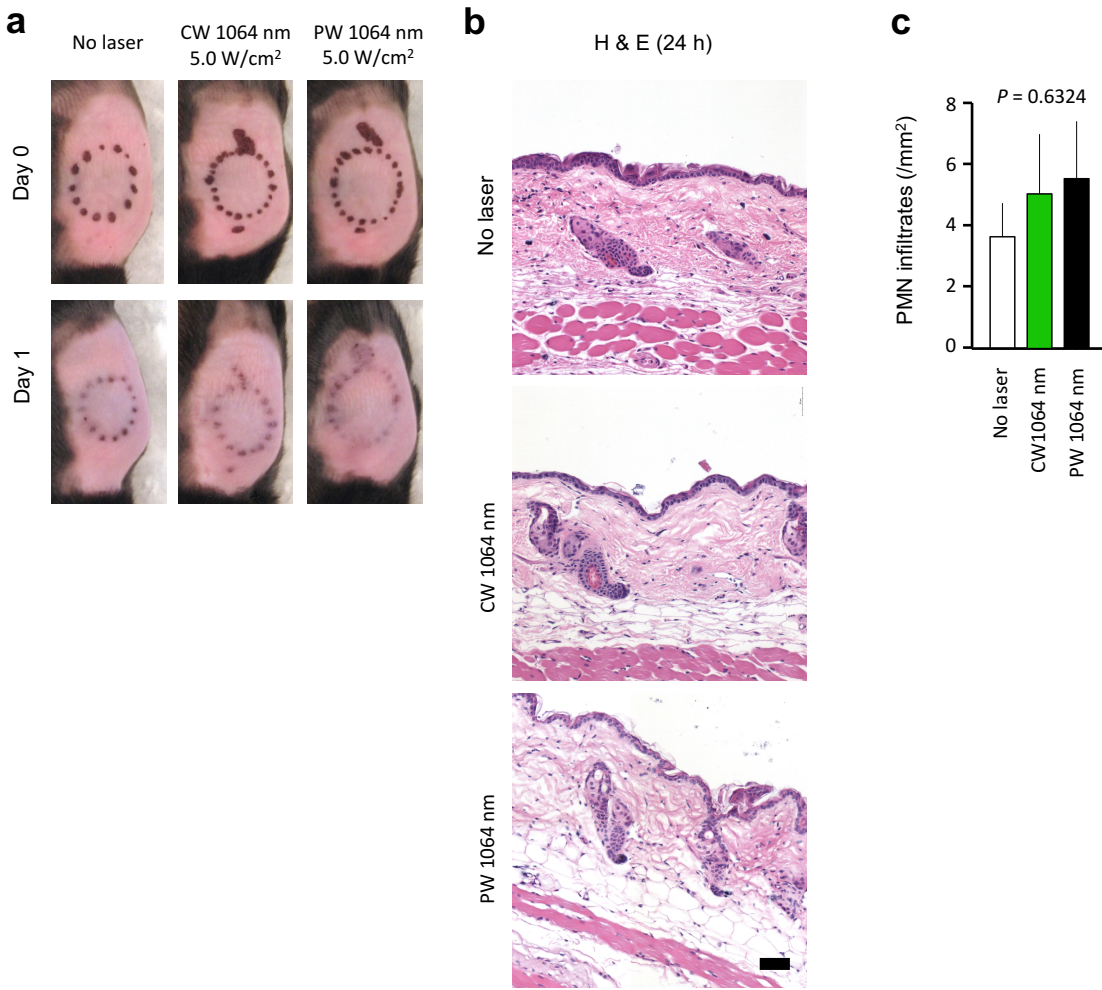

**Figure S2. Effect of NIR laser on skin tissue.**

(a) Images of the back of mice for visual inspection after the indicated CW or PW near-infrared (NIR) laser treatment. Note that no visual damage was observed at any time point. Representative images at 6 and 24 hours for each group are presented. (b) Microscopic assessment of skin damage and inflammatory infiltration after laser treatment. Note that no microscopic damage was observed at 2 hours (data not shown). Representative images of hematoxylin-eosin-stained skin tissue 24 hours after the NIR laser treatment are presented. The bar indicates 50  $\mu$ m. (c) Quantification of polymorphonuclear leukocytes (PMN) 24 hours after the NIR laser treatment. Note that no significant increase in PMN infiltration was observed at 2 or 6 hours (data not shown). Error bars show means  $\pm$  s.e.m. Results are pooled from two independent experiments and analyzed using one-way ANOVA with Tukey's correction. (a-c)  $n = 2-3$  for each group.

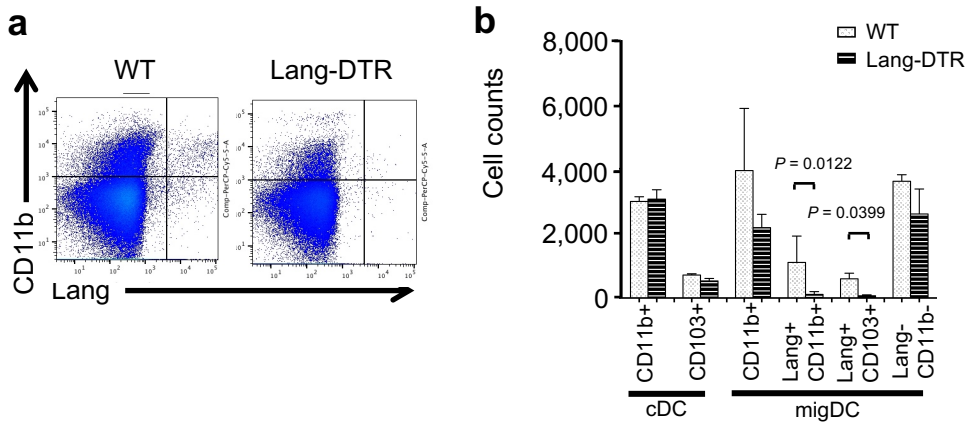

**Supplementary Figure S3. Depletion of cells harboring DTR in Langerin-GFP/DTR animals.**

In order to deplete cells of interest, 4 ng/g diphtheria toxin (DT) was intraperitoneally (i.p.) injected into wild-type (WT) and Lang-DTR mice. The following day, the DT treated mice were vaccinated intradermally with 40  $\mu$ g OVA. DCs in skin-draining lymph nodes (skin-dLN) were processed and stained for multi-parameter flow cytometry 24 hours after intradermal vaccination. (a)

Representative gates of Langerin (Lang)<sup>+</sup> migratory DC (migDC). (b) Cell counts of migDC and classical lymphoid tissue-resident DCs (cDCs) subsets in skin-dLN with or without DT treatment. Experimental and control groups: (a-b)  $n = 10$ , 6 for WT, Lang-DTR, respectively. Data are derived from three independent experiments.

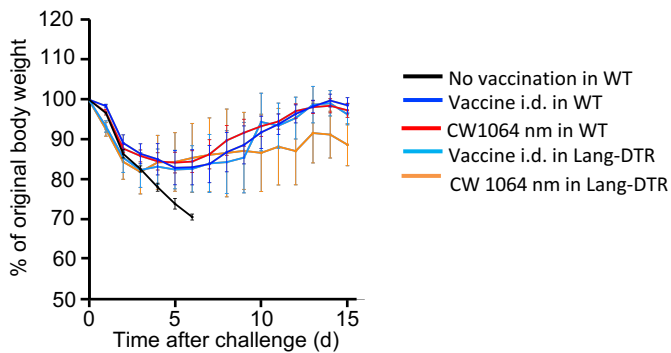

### Supplementary Figure S4. Effect of laser illumination on body weight following viral challenge.

In order to examine the role of Lang<sup>+</sup> cells, 4 ng/g diphtheria toxin (DT) was intraperitoneally (i.p.) injected into wild-type (WT) and Lang-DTR mice. Mice were then vaccinated intradermally with 1 µg inactivated influenza virus (A/PR/8/34) with or without CW 1064 nm NIR laser treatment 24 h after the DT treatment. 28 days later, the mice were intra-nasally challenged with homologous virus. Body weights were monitored daily for 15 days. Mean body weight ± s.e.m. of each experimental group was determined at each time point. Experimental and control groups: *n*=10, 15, 8, 5, 4 for no vaccine in WT, vaccine i.d. in WT, vaccine i.d. + CW 1064 nm in WT, vaccine i.d. in Lang/DTR + DT, vaccine i.d. + CW 1064 nm in Lang/DTR + DT, respectively.
